# Supplementary material for: Delayed Post-Pancreaticoduodenectomy Hemorrhage: Is Endovascular Treatment A Strategic Necessity?
Source: Research Square preprint supplement (doi:10.21203/rs.3.rs-8572972/v1), 2026-01-20
Supplement: Supplementary file 1 [file 259baa72fffbbb7ab1e8b3f2.docx]

Table 1: Demographic And Clinical Features Of Patients

|  | n (%) |
| --- | --- |
| Number of patients | 13(100.0%) |
| Age  Mean  Median(Min-Max) | 63.50±7.88  61.0(48.0-77.0) |
| Sex  Male  Female | 9 (%69.2)  4 (%30.8) |
| Tumor Size  Mean ± SS  Median (Min-Max) | 3.15±1.48  2.75 (1.6-7.0) |
| Tumor Location  Pankreas  Ampulla | 10  2 |
| Histologic Type  Adenocarcinoma | 13(%100) |
| Number of Metastatic lymph Nodes  Mean ± SS  Median(Min-Max) | 3.14 ±2.57  3,50(0-8) |
| Decrease in Hb(g/dL)  Mean ± SS  Median(min-max) | 2.89±1.48  4(1-6) |
| Units of Blood Transfused  Mean ± SS  Median(min-max) | 3.77±0.78  2.9(2-4.7) |
| POPF and Bile Leak  Yes  No | 8(%61.5)  5(%38.5) |
| Bleeding Time  Mean ± SS  Median(min-max) | 10.3±5.12  9(3-23) |
| İnitial Sign  Drain Bleeding  Wound Bleeding  Syncope | 10(%76.9)  2(%15.4)  1(%7.7) |
| Bleeding Side  GDA  CHA  LGA | 8(%61.5)  4(%30.8)  1(%7.7) |
| Treatment  Endovascular  Surgery | 8(%61.5)  5(%38.5) |
| Survival  Alive  Died | 8(%61.5)  5(%38.5) |

POPF: Postoperative pancreatic fistula, GDA: Gastroduodenal Artery, CHA: Common Hepatic Artery, LGA: Left Gastric Artery, Hb: Hemoglobin

Table 2:Detailed Clinical Characteristics and Outcomes of Patients

|  | POPF and Bile Leak | Bleeding Time | Initial Sign | Sentinel bleeding | CTA  Findings | Bleeding Site | Treatment | Re-  bleeding | Outcome | Cause Of Death |
| --- | --- | --- | --- | --- | --- | --- | --- | --- | --- | --- |
| 1 | PJ Leak | 20 | Drain Bleeding | Yes | Extravasation | GDA | Surgery;GDA Ligation | Yes | Dead | DIC,  MOFS |
| 2 | PJ Leak | 10 | Drain Bleeding | Yes | Extravasation | GDA | Surgery;GDA Ligation+  Subtotal PD | No | Dead | MOFS |
| 3 | No | 3 | Drain Bleeding | Yes | Hematoma | CHA | Surgery;HA Ligation+  Subtotal PD | Yes | Dead | DIC,  MOFS |
| 4 | PJ Leak | 7 | Drain Bleeding | Yes | Extravasation | GDA | Surgery;Gda Ligation+  Subtotal PD | No | Alive |  |
| 5 | No | 8 | Wound Bleeding | No | Extravasation | GDA | Surgery;GDA Ligation | No | Alive |  |
| 6 | PJ Leak | 23 | Drain Bleeding | Yes | Extravasation | GDA | EVT; Stent  +CHA Coil | Yes | Alive |  |
| 7 | PJ Leak | 9 | Drain Bleeding | Yes | Extravasation | GDA | EVT; Stent  +CHA Coil | No | Alive |  |
| 8 | No | 8 | Drain Bleeding | Yes | Hematoma | CHA | EVT;CHA Coil | No | Alive |  |
| 9 | HJ Leak | 10 | Drain Bleeding | Yes | Hematoma | CHA | EVT;CHA Coil | No | Dead | Pulmonary Aspiration |
| 10 | No | 10 | Drain Bleeding | Yes | Hematoma | CHA | EVT;CHA Coil | No | Alive |  |
| 11 | No | 9 | Syncope | No | Extravasation | GDA | EVT;CHA Coil | No | Alive |  |
| 12 | PJ Leak | 9 | Drain Bleeding | Yes | Extravasation | GDA | EVT;CHA Coil | Yes | Alive |  |
| 13 | PJ Leak | 10 | Wound Bleeding | No | Hematoma | LGA | EVT;  LGA Stent | No | Dead | Sepsis |

POPF: Postoperative pancreatic fistula, CTA: Computed Tomography Angiography,

PJ: Pancreaticojejunostomy, HJ: Hepaticojejunostomy, GDA: Gastroduodenal Artery, CHA: Common Hepatic Artery, LGA: Left Gastric Artery, DIC: Disseminated İntravascular Coagulation, MOFS: Multiple Organ Failure Syndrome, EVT: Endovascular Therapy

Table 3: Detailed Angiographic Findings and Clinical Outcomes of Patients Undergoing Endovascular Treatment

|  | Angiographic Findings | EVT | Re-  bleeding | Second Line Management | Hemostasis | Liver Ischemia | Survival |
| --- | --- | --- | --- | --- | --- | --- | --- |
| 1 | GDA Extravasation | GDA Stent | Yes | CHA Coil | Complete | Transient elevation of LFTs | Alive |
| 2 | GDA Extravasation | GDA Stent+CHA Coil | No |  | Complete | Transient elevation of LFTs | Alive |
| 3 | CHA Pseudoaneurysm | CHA Coil | No |  | Complete | No | Alive |
| 4 | CHA Pseudoaneurysm | CHA Coil | No |  | Complete | Transient elevation of LFTs | Died |
| 5 | CHA Pseudoaneurysm | CHA Coil | No |  | Complete | No | Alive |
| 6 | GDA Extravasation | CHA Coil | No |  | Complete | No | Alive |
| 7 | GDA Extravasation | CHA Coil | Yes | CHA Coil | Complete | No | Alive |
| 8 | LGA Pseudoaneurysm | LGA Stent | No |  | Complete | No | Died |

GDA: Gastroduodenal Artery, CHA: Common Hepatic Artery, LGA: Left Gastric Artery, EVT: Endovascular Therapy, LFT:Liver Function Test

Table 4: Comparison of 90-Day Survival Outcomes Between Endovascular Treatment and Surgical Management

| Survival | EVT | Surgery |
| --- | --- | --- |
| Died | 2 (25%) | 3 (60%) |
| Alive | 6 (75%) | 2 (40%) |
| Total | 8 (100%) | 5 (100%) |

EVT: Endovascular Therapy
